# Supplementary material for: Statins Improve Long Term Patency of Arteriovenous Fistula for Hemodialysis
Source: PubMed Central journal article supplement (PMC4763284; doi:10.1038/srep22197), 2016-02-23
Supplement: srep22197-s1.pdf [file srep22197-s1.pdf]

## Supplementary Information

### Statins Improve Long Term Patency of Arteriovenous Fistula for Hemodialysis

Hao-Hsiang Chang MD, MSc<sup>1,2</sup>, Yu-Kang Chang PhD<sup>3</sup>, Chia-Wen Lu MD<sup>1</sup>, Chi-Ting Huang<sup>3</sup>, Chiang-Ting Chien PhD<sup>2</sup>, Kuan-Yu Hung MD, PhD<sup>4</sup>, Kuo-Chin Huang MD, PhD<sup>1,3,5</sup>, Chih-Cheng Hsu, MD, DrPH<sup>1,3,6,7</sup>

<sup>1</sup>Department of Family Medicine, National Taiwan University Hospital, Taipei, Taiwan

<sup>2</sup>Department of Life Science, National Taiwan Normal University, Taipei, Taiwan

<sup>3</sup>Institute of Population Health Sciences, National Health Research Institutes, Zhunan, Miaoli County, Taiwan

<sup>4</sup>Department of Nephrology, National Taiwan University Hospital, Taipei, Taiwan

<sup>5</sup>Department of Family Medicine, College of Medicine, National Taiwan University, Taipei, Taiwan

<sup>6</sup>Department of Health Services Administration, China Medical University, Taichung City, Taiwan.

<sup>7</sup>Institute of Clinical Medicine, National Yang Ming University, Taipei, Taiwan

**Correspondence and reprint requests should be addressed to:**

Chih-Cheng Hsu, MD, DrPH, Institute of Population Health Sciences, National Health  
Research Institutes, 35, Keyan Road, Zhunan Town, Miaoli County 350, Taiwan. Tel:  
886-37-246166 ext 36336; Fax: 886-37-586-261; E-mail: cch@nhri.org.tw.

or

Kuo-Chin Huang MD, PhD, Department of Family Medicine, National Taiwan  
University Hospital, Taipei, Taiwan. Address: 7 Chung-Shan South Road, Taipei,  
Taiwan 100. Tel: 886-2-23123456ext 66081; Fax: 886-2-23118674; E-mail:  
bretthuang@ntu.edu.tw

Supplementary table S1. Demographic characteristics, comorbid diseases and medications exposure between statin users and nonusers in the propensity-score matched cohort

|                       | Statin nonusers<br>N=3,181 | Statin users<br>N=3,864 | Standardized<br>Difference |
|-----------------------|----------------------------|-------------------------|----------------------------|
| Follow up time (year) |                            |                         | -0.06117                   |
| Means (SD)            | 3.74 (2.61)                | 3.59 (2.47)             |                            |
| Age (year)            |                            |                         | 0.03873                    |
| Means (SD)            | 59.3 (13.1)                | 59.8 (12.4)             |                            |
| Sex (n, %)            |                            |                         | -0.00033                   |
| Male                  | 1279 (40.2)                | 1553 (40.2)             |                            |
| Female                | 1902 (59.8)                | 2311 (59.8)             |                            |
| Location (n, %)       |                            |                         | 0.018828                   |
| City                  | 865 (27.2)                 | 1046 (27.1)             |                            |
| Township              | 1095 (34.4)                | 1281 (33.1)             |                            |
| Rural area            | 1221 (38.4)                | 1537 (39.8)             |                            |
| Comorbidity           |                            |                         |                            |
| CHF                   | 691 (21.7)                 | 873 (22.6)              | 0.020957                   |
| CVA                   | 502 (15.8)                 | 615 (15.9)              | 0.003695                   |
| PVD                   | 198 (6.2)                  | 264 (6.8)               | 0.024605                   |
| DM                    | 1613 (50.7)                | 1992 (51.6)             | 0.016912                   |
| ASHD                  | 841 (26.4)                 | 1054 (27.3)             | 0.018932                   |
| Other heart disease   | 340 (10.7)                 | 440 (11.4)              | 0.022295                   |
| COPD                  | 402 (12.6)                 | 517 (13.4)              | 0.022067                   |
| GI disease            | 816 (25.7)                 | 1070 (27.7)             | 0.046116                   |
| Liver disease         | 295 (9.3)                  | 379 (9.8)               | 0.018198                   |
| Cancer                | 178 (5.6)                  | 244 (6.3)               | 0.03038                    |
| Medication use        |                            |                         |                            |
| NSAID                 | 2076 (65.3)                | 2552 (66.1)             | 0.016488                   |
| Aspirin               | 889 (28.0)                 | 1142 (29.6)             | 0.035521                   |
| Clopidogrel           | 127 (4.0)                  | 170 (4.4)               | 0.020304                   |
| Warfarin              | 36 (1.1)                   | 41 (1.1)                | -0.00678                   |
| ACEI                  | 1207 (37.9)                | 1497 (38.7)             | 0.016415                   |
| ARB                   | 1186 (37.3)                | 1477 (38.2)             | 0.019405                   |
| Beta-blocker          | 1708 (53.7)                | 2101 (54.4)             | 0.013641                   |
| Non-DHP CCB           | 468 (14.7)                 | 616 (15.9)              | 0.034134                   |
| DHP CCB               | 2484 (78.1)                | 3035 (78.6)             | 0.011086                   |
| Biguanide             | 516 (16.2)                 | 637 (16.5)              | 0.007142                   |

|                             |            |             |          |
|-----------------------------|------------|-------------|----------|
| Sulfonylurea                | 929 (29.2) | 1122 (29.0) | -0.00368 |
| Alpah glucosidase inhibitor | 195 (6.1)  | 253 (6.6)   | 0.017131 |
| Thiazolidinedione           | 159 (5.0)  | 202 (5.2)   | 0.010409 |
| Meglitinide                 | 329 (10.3) | 435 (11.3)  | 0.029482 |
| Insulin                     | 836 (26.3) | 1080 (28.0) | 0.03755  |
| Statin                      | 0 (0.0)    | 0 (0.0)     | -        |

---

Abbreviations: CHF, congestive heart failure; CVA, cerebral vascular accident; PVD, peripheral vascular disease; DM, diabetes mellitus; ASHD, atherosclerotic heart disease; COPD, chronic obstructive pulmonary disease; GI, gastrointestinal; NSAID, non steroid anti-inflammatory drug; ACEI, angiotensin converting enzyme inhibitor; ARB, angiotensin II receptor blocker; DHP, dihydropyridine; CCB, calcium channel blocker.

Supplementary table S2. The logistic regression model used for selecting the propensity-score matched cohort

| parameter                  | $\beta$ | SE   | P value | OR   | 95%CI |      |
|----------------------------|---------|------|---------|------|-------|------|
| Age (ref=20-39)            |         |      |         |      |       |      |
| 40-49                      | -0.21   | 0.08 | 0.0126  | 0.81 | 0.69  | 0.96 |
| 50-59                      | -0.40   | 0.08 | <.0001  | 0.67 | 0.57  | 0.78 |
| 60-69                      | -0.20   | 0.08 | 0.012   | 0.82 | 0.70  | 0.96 |
| $\geq 70$                  | 0.12    | 0.08 | 0.1558  | 1.12 | 0.96  | 1.32 |
| Male                       | 0.57    | 0.04 | <.0001  | 1.78 | 1.65  | 1.91 |
| Location (ref= City)       |         |      |         |      |       |      |
| Township                   | 0.02    | 0.05 | 0.7159  | 1.02 | 0.93  | 1.11 |
| Rural area                 | 0.23    | 0.04 | <.0001  | 1.26 | 1.16  | 1.37 |
| Income (ref=Middle income) |         |      |         |      |       |      |
| poor                       | 0.18    | 0.16 | 0.2513  | 1.20 | 0.88  | 1.65 |
| Low income                 | 0.02    | 0.04 | 0.6605  | 1.02 | 0.93  | 1.11 |
| High income                | 0.03    | 0.07 | 0.7158  | 1.03 | 0.89  | 1.19 |
| Comorbidity                |         |      |         |      |       |      |
| CHF                        | 0.05    | 0.05 | 0.3302  | 1.05 | 0.95  | 1.15 |
| CVA                        | -0.07   | 0.05 | 0.1502  | 0.93 | 0.84  | 1.03 |
| PVD                        | 0.06    | 0.07 | 0.41    | 1.06 | 0.93  | 1.21 |
| DM                         | -0.39   | 0.05 | <.0001  | 0.68 | 0.62  | 0.75 |
| ASHD                       | -0.08   | 0.05 | 0.0711  | 0.92 | 0.84  | 1.01 |
| Other heart disease        | 0.09    | 0.06 | 0.1108  | 1.10 | 0.98  | 1.22 |
| COPD                       | 0.11    | 0.05 | 0.0308  | 1.12 | 1.01  | 1.24 |
| GI disease                 | 0.07    | 0.04 | 0.0804  | 1.07 | 0.99  | 1.16 |
| Liver disease              | 0.37    | 0.06 | <.0001  | 1.44 | 1.29  | 1.62 |
| Cancer                     | 0.01    | 0.07 | 0.878   | 1.01 | 0.88  | 1.16 |
| Medication use             |         |      |         |      |       |      |
| NSAID                      | 0.04    | 0.04 | 0.348   | 1.04 | 0.96  | 1.12 |
| Aspirin                    | -0.19   | 0.04 | <.0001  | 0.83 | 0.76  | 0.90 |
| Clopidogrel                | -0.33   | 0.09 | 0.0004  | 0.72 | 0.60  | 0.86 |
| Warfarin                   | 0.00    | 0.17 | 0.9878  | 1.00 | 0.72  | 1.38 |
| ACEI                       | 0.04    | 0.04 | 0.3185  | 1.04 | 0.96  | 1.12 |
| ARB                        | -0.06   | 0.04 | 0.1027  | 0.94 | 0.87  | 1.01 |
| Beta-blocker               | -0.16   | 0.04 | <.0001  | 0.85 | 0.79  | 0.92 |
| Non-DHP CCB                | 0.02    | 0.05 | 0.7319  | 1.02 | 0.92  | 1.12 |
| DHP CCB                    | -0.22   | 0.05 | <.0001  | 0.80 | 0.73  | 0.88 |
| Biguanide                  | -0.07   | 0.06 | 0.2628  | 0.94 | 0.84  | 1.05 |

|                             |       |      |        |      |      |      |
|-----------------------------|-------|------|--------|------|------|------|
| Sulfonylurea                | -0.08 | 0.06 | 0.1491 | 0.92 | 0.83 | 1.03 |
| Alpah glucosidase inhibitor | -0.22 | 0.08 | 0.0042 | 0.80 | 0.69 | 0.93 |
| Thiazolidinedione           | -0.32 | 0.09 | 0.0002 | 0.73 | 0.61 | 0.86 |
| Meglitinide                 | 0.03  | 0.06 | 0.6586 | 1.03 | 0.91 | 1.16 |
| Insulin                     | 0.00  | 0.05 | 0.9795 | 1.00 | 0.91 | 1.09 |

---

Note: the Cox & Snell R-square: 0.4254; the Nagelkerke R-square: 0.6254; the Hosmer and Lemeshow Goodness-of-fit test: P=0.8956

Abbreviations: CHF, congestive heart failure; CVA, cerebral vascular accident; PVD, peripheral vascular disease; DM, diabetes mellitus; ASHD, atherosclerotic heart disease; COPD, chronic obstructive pulmonary disease; GI, gastrointestinal; NSAID, non steroid anti-inflammatory drug; ACEI, angiotensin converting enzyme inhibitor; ARB, angiotensin II receptor blocker; DHP, dihydropyridine; CCB, calcium channel blocker.

Supplementary table S3. Hazard ratio of permanent hemodialysis access recreation for statin users by time-dependent Cox regression models

|         | HR                 |
|---------|--------------------|
| Overall | 0.80 (0.73-0.88)** |
| AVF     | 0.80 (0.72-0.90)** |
| AVG     | 0.84 (0.70-1.00)   |

\*p<0.05; \*\*p<0.001

Supplementary table S4. Competing-risk adjusted hazard ratio of permanent hemodialysis access recreation for statin users compared to nonusers

|         | HR                |
|---------|-------------------|
| Overall | 0.92 (0.85-1.00)  |
| AVF     | 0.87 (0.79-0.96)* |
| AVG     | 1.07 (0.90-1.25)  |

\*p<0.05; \*\*p<0.001

⌘ The probability of death and renal transplantation was considered as competing risks adjusted in the model.

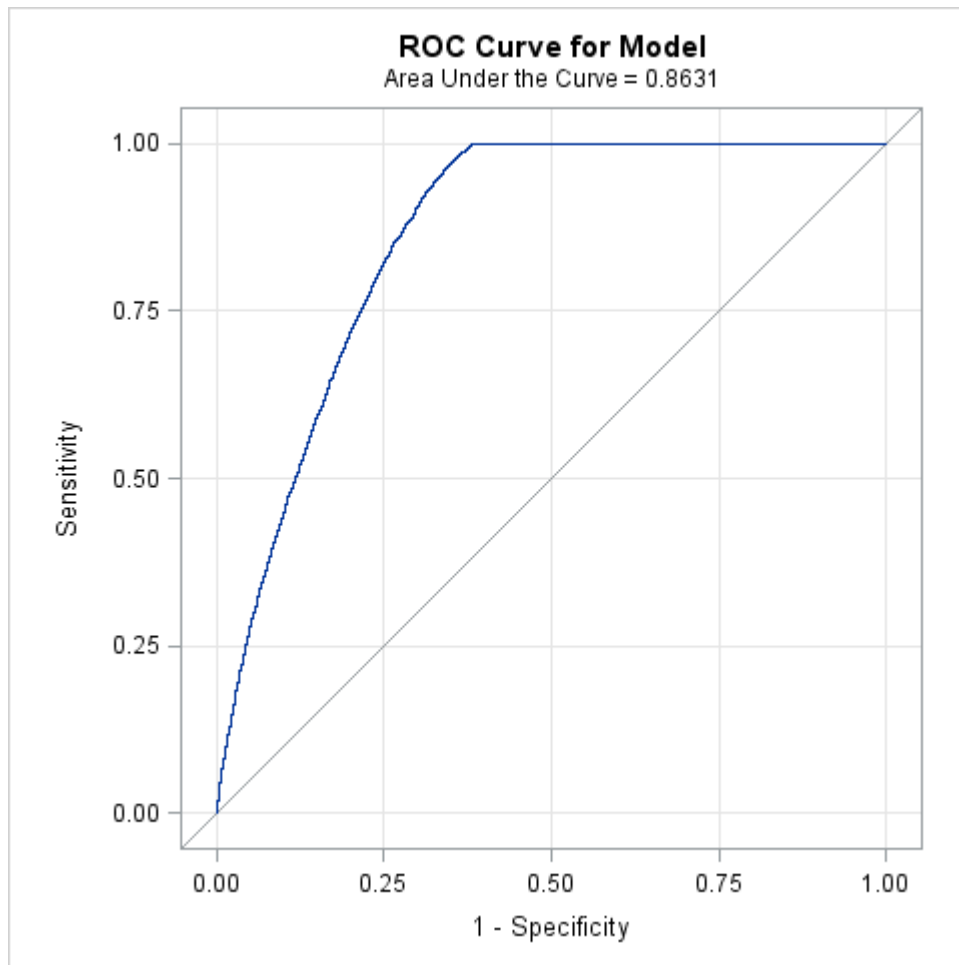

Supplementary figure S1. ROC curve for the logistic regression used for creating propensity scores. The area under curve is 0.8631.
